# Supplementary material for: Accumulation of Fungal Pathogens Infecting the Invasive Spotted Lanternfly, Lycorma delicatula
Source: MDPI journal article supplement (doi:10.3390/insects14120912), 2023-11-27
Supplement: s1 [file s1]

Table S1. GenBank accession numbers for additional sequenced isolates of entomopathogenic fungi infecting *L. delicatula*.

| Fungal species                | Isolate        | ITS                   | LSU      | RPB1     | RPB2     | TEF 1- $\alpha$ |
|-------------------------------|----------------|-----------------------|----------|----------|----------|-----------------|
| <i>Akanthomyces muscarius</i> | 27-Jul-AFF4a   | OR582987              | OR577036 | OR602845 |          | OR602796        |
| <i>Akanthomyces muscarius</i> | 27-Jul-AFF5a   | OR582988              | OR577037 |          |          | OR672128        |
| <i>Akanthomyces muscarius</i> | 2-Nov-GR29b    | OR582989 <sup>1</sup> | OR577038 | OR602846 | OR602850 | OR602797        |
| <i>Akanthomyces muscarius</i> | 7-Sep-AFF-FC10 | OR582990 <sup>1</sup> | OR577039 | OR602847 | OR602851 | OR602798        |
| <i>Akanthomyces muscarius</i> | 23-Sep-GR-FC1  | OR582986              |          | OR602844 |          | OR672129        |
| <i>Akanthomyces muscarius</i> | 12-Oct-AFF-FC5 | OR582985 <sup>1</sup> | OR577035 | OR602843 | OR602849 | OR602795        |
| <i>Clonostachys rosea</i>     | 20-Jul-GR7a    | OR582992 <sup>1</sup> |          |          |          | OR602800        |
| <i>Clonostachys rosea</i>     | 27-Jul-GR5a    | OR582993 <sup>1</sup> |          |          |          | OR602801        |
| <i>Cordyceps javanica</i>     | SS-L3-14F      | OR583014              |          |          |          | OR672130        |
| <i>Fusarium avenaceum</i>     | 22-Jun-CCC2b   | OR582997 <sup>1</sup> |          |          |          | OR602805        |
| <i>Fusarium avenaceum</i>     | 13-Jul-F2      | OR582995 <sup>1</sup> |          |          |          | OR602803        |
| <i>Fusarium avenaceum</i>     | 20-Jul-AFF4    | OR582996              |          |          |          | OR602804        |
| <i>Fusarium concentricum</i>  | 8-Jun-F1       |                       |          |          |          | OR602808        |
| <i>Fusarium concentricum</i>  | 3-Aug-AFF7     |                       |          |          |          | OR602807        |
| <i>Fusarium concentricum</i>  | 23-Sep-CCC10   | OR582998              |          |          |          | OR602806        |
| <i>Fusarium falsibabinda</i>  | 5-Oct-GR18     |                       |          |          |          | OR602812        |
| <i>Fusarium falsibabinda</i>  | 2-Nov-F23      | OR582999 <sup>1</sup> |          |          |          | OR602809        |
| <i>Fusarium falsibabinda</i>  | 2-Nov-F31      | OR583000              |          |          |          | OR602810        |
| <i>Fusarium falsibabinda</i>  | 2-Nov-GR-FC16  | OR583001              |          |          |          | OR602811        |
| <i>Fusarium fujikuroi</i>     | 13-Jul-F1      |                       |          |          | OR602853 | OR602816        |
| <i>Fusarium fujikuroi</i>     | 27-Jul-AFF9a   | OR583004              |          |          | OR602854 | OR602824        |
| <i>Fusarium fujikuroi</i>     | 27-Jul-F1      |                       |          |          | OR602855 | OR602826        |
| <i>Fusarium fujikuroi</i>     | 3-Aug-AFF4     |                       |          |          |          | OR602828        |
| <i>Fusarium fujikuroi</i>     | 3-Aug-GR12     |                       |          |          |          | OR602829        |
| <i>Fusarium fujikuroi</i>     | 10-Aug-GR2     |                       |          |          |          | OR602814        |
| <i>Fusarium fujikuroi</i>     | 10-Aug-GR9     |                       |          |          |          | OR602815        |

|                             |                  |                       |          |          |
|-----------------------------|------------------|-----------------------|----------|----------|
| <i>Fusarium fujikuroi</i>   | 10-Aug-GR12      |                       |          | OR602813 |
| <i>Fusarium fujikuroi</i>   | 24-Aug-AFF3      | OR583003              |          | OR602819 |
| <i>Fusarium fujikuroi</i>   | 24-Aug-GR2       |                       |          | OR602821 |
| <i>Fusarium fujikuroi</i>   | 24-Aug-GR15      |                       |          | OR602820 |
| <i>Fusarium fujikuroi</i>   | 24-Aug-GR22      |                       |          | OR602822 |
| <i>Fusarium fujikuroi</i>   | 24-Aug-GR25      |                       |          | OR602823 |
| <i>Fusarium fujikuroi</i>   | 7-Sep-GR7        |                       |          | OR602837 |
| <i>Fusarium fujikuroi</i>   | 7-Sep-GR22       | OR583008              |          | OR602836 |
| <i>Fusarium fujikuroi</i>   | 7-Sep-CCC1       |                       |          | OR602833 |
| <i>Fusarium fujikuroi</i>   | 7-Sep-CCC13      |                       |          | OR602834 |
| <i>Fusarium fujikuroi</i>   | 7-Sep-CCC15W     | OR583007              |          | OR602835 |
| <i>Fusarium fujikuroi</i>   | 23-Sep-GR27      |                       |          | OR602818 |
| <i>Fusarium fujikuroi</i>   | 23-Sep-F24       | OR583002              |          | OR602817 |
| <i>Fusarium fujikuroi</i>   | 5-Oct-GR10       | OR583006              |          | OR602830 |
| <i>Fusarium fujikuroi</i>   | 5-Oct-GR15       |                       |          | OR602831 |
| <i>Fusarium fujikuroi</i>   | 5-Oct-GR16       |                       |          | OR602832 |
| <i>Fusarium fujikuroi</i>   | O-L4-2           | OR583018              |          | OR602842 |
| <i>Fusarium fujikuroi</i>   | 27-Jul-AFF-FC3   |                       |          | OR602825 |
| <i>Fusarium fujikuroi</i>   | 29-Sep-AFF-FC19Y | OR583005              |          | OR602827 |
| <i>Fusarium graminearum</i> | 5-Oct-AFF31      | OR583011 <sup>1</sup> | OR602857 | OR602840 |
| <i>Fusarium graminearum</i> | 5-Oct-AFF33      | OR583012 <sup>1</sup> | OR602858 | OR602841 |
| <i>Fusarium graminearum</i> | 2-Nov-GR15       | OR583010              | OR602856 | OR602839 |
| <i>Fusarium graminearum</i> | 2-Nov-CCC22      | OR583009              |          | OR602838 |
| <i>Sarocladium strictum</i> | 27-Jul-F3        | OR583013 <sup>1</sup> |          | OR672133 |
| <i>Trichothecium roseum</i> | AFF-L3-4C        | OR583016              |          | OR672135 |

<sup>1</sup> Isolates which were amplified and sequenced with ITS1 (mod) for the forward primer.

Table S2. Methods used for challenging *L. delicatula* to confirm pathogenicity of fungal species.

| Fungal species                     | Conditions promoting conidial production |          |             |                  | Conidial concentration (conidia/ml) | Instars tested | Testing results <sup>1</sup> |
|------------------------------------|------------------------------------------|----------|-------------|------------------|-------------------------------------|----------------|------------------------------|
|                                    | Media                                    | Parafilm | Light       | Temperature (°C) |                                     |                |                              |
| <i>Akanthomyces muscarius</i>      | PDA                                      | Yes      | Dark        | 23               | $6.7 \times 10^7$                   | A3             | Visual ID                    |
| <i>Clonostachys eriocamporesii</i> | 1/3 PDA                                  | No       | 12:12 light | 28               | $1 \times 10^7$                     | A2             | KP                           |
| <i>Clonostachys rosea</i>          | PDA                                      | Yes      | Dark        | 24               | $1 \times 10^7$                     | 1–2            | KP                           |
| <i>Colletotrichum fioriniae</i>    | PDA                                      | Yes      | Dark        | 24               | $1 \times 10^7$                     | A2             | KP                           |
| <i>Cordyceps cateniannulata</i>    | PDA                                      | Yes      | Dark        | 26               | $7.4 \times 10^6$                   | A3             | Visual ID                    |
| <i>Cordyceps javanica</i>          | PDA                                      | Yes      | Dark        | 24               | $1 \times 10^7$                     | A3             | KP                           |
| <i>Flavocillium bifurcatum</i>     | PDA                                      | Yes      | Dark        | 24               | $1 \times 10^7$                     | A2             | KP                           |
| <i>Fusarium avenaceum</i>          | PDA                                      | No       | 12:12 UV    | 24               | $1 \times 10^7$                     | A1             | KP                           |
| <i>Fusarium concentricum</i>       | PDA                                      | Yes      | Dark        | 24               | $1 \times 10^7$                     | 4              | KP                           |
| <i>Fusarium falsibabinda</i>       | PDA                                      | Yes      | Dark        | 23               | $3.5 \times 10^7$                   | A3             | Visual ID                    |
| <i>Fusarium fujikuroi</i>          | PDA                                      | Yes      | Dark        | 24               | $1 \times 10^7$                     | 2–3            | KP                           |
| <i>Fusarium graminearum</i>        | PDA                                      | No       | 12:12 UV    | 24               | $1 \times 10^7$                     | A1             | KP                           |
| <i>Samsoniella</i> sp.             | PDA                                      | Yes      | Dark        | 24               | $1 \times 10^7$                     | 4              | KP                           |
| <i>Sarocladium strictum</i>        | PDA                                      | Yes      | Dark        | 24               | $1 \times 10^7$                     | 4              | KP                           |
| <i>Trichothecium roseum</i>        | SDA                                      | Yes      | Dark        | 24               | $1 \times 10^7$                     | A2             | KP                           |

<sup>1</sup> KP = Koch's postulates (reisolation from cadaver and ID); Visual ID = in 2021, we did not reisolate from infected insects but visually checked fungal outgrowth and conidia from cadavers.
